# Supplementary material for: Characterization of Immune Cell Infiltration and Collagen Type III Disorganization in Human Secondary Lymphedema: A Case-control Study
Source: PubMed Central journal article supplement — Plast Reconstr Surg Glob Open. 2024 Jun 17;12(6):e5906. doi: 10.1097/GOX.0000000000005906 (PMC11191027; doi:10.1097/gox.0000000000005906), 2024-06-17
Supplement: gox-12-e5906-s001.pdf [file gox-12-e5906-s001.pdf]

| Inclusion Criteria Case Group                                                                                                                      | Exclusion Criteria Case Group                                                                 |
|----------------------------------------------------------------------------------------------------------------------------------------------------|-----------------------------------------------------------------------------------------------|
| Patients with diagnosed clinically secondary lymphedema by 2 or more lymphedema specialized physicians                                             | Patient with chronic inflammatory diseases                                                    |
| Patients with therapeutic failure after at least 6 months of conservative treatment including compression garments and manual lymphatic drainage   | Patients with history if chronic infections                                                   |
| Patients with preoperative confirmation of a lymphatic dysfunction by ICG lymphography and/or lymphatic MRI                                        | Patients with acute infections like cellulitis                                                |
| Signed consent to donate tissue samples for the study as well as epidemiological data and images                                                   | Lymphedema patients with abnormal preoperative laboratory test (including C-reactive protein) |
| Patients undergoing lymphovenous anastomoses or vascularized lymph node transfer                                                                   | Patients not meeting the inclusion criteria                                                   |
| Angiography and Venous Duplex Sonography excluding concomitant chronic venous insufficiency or peripheral artery disease on the affected extremity | Patients with regular intake of NSAIDs                                                        |
|                                                                                                                                                    | Patients with chemotherapy or radiotherapy in the last year                                   |

| Inclusion Criteria Control Group                                                                                                                | Exclusion Criteria Control Group                                                   |
|-------------------------------------------------------------------------------------------------------------------------------------------------|------------------------------------------------------------------------------------|
| Patients that required a free flap                                                                                                              | Patient with chronic inflammatory diseases                                         |
| Patients with planned free flap, with skin included in the flap design, from a healthy donor site                                               | Patients with history if chronic infections                                        |
| Signed consent to donate tissue samples for the study as well as epidemiological data and images                                                | Patients with acute infections like cellulitis                                     |
| Angiography and Venous Duplex                                                                                                                   | Patients with abnormal preoperative laboratory test (including C-reactive protein) |
| Angiography and Venous Duplex Sonography excluding concomitant chronic venous insufficiency or peripheral artery disease on the donor extremity | Patients not meeting the inclusion criteria                                        |
|                                                                                                                                                 | Patients with regular intake of NSAIDs                                             |
|                                                                                                                                                 | Cancer therapy in the last 3 years                                                 |
