# Supplementary material for: Characterization of Immune Cell Infiltration and Collagen Type III Disorganization in Human Secondary Lymphedema: A Case-control Study
Source: PubMed Central journal article supplement — Plast Reconstr Surg Glob Open. 2024 Jun 17;12(6):e5906. doi: 10.1097/GOX.0000000000005906 (PMC11191027; doi:10.1097/gox.0000000000005906), 2024-06-17
Supplement: gox-12-e5906-s002.pdf [file gox-12-e5906-s002.pdf]

|                      | Control group                  | Lymphedema                 | p-value |
|----------------------|--------------------------------|----------------------------|---------|
| n                    | 22                             | 14                         |         |
| Sex                  |                                |                            |         |
| Female               | 6 (27.3%)                      | 9 (64.3%)                  | 0.04    |
| Male                 | 18 (72.7%)                     | 5 (35.7%)                  | 0.04    |
| Age                  | 64.9 ± 18.1                    | 54,29 ± 16,07              | 0.08    |
| BMI                  | 29,90 ± 5,82 kg/m <sup>2</sup> | 28.0±8.6 kg/m <sup>2</sup> | 0.42    |
| Lymphedema etiology  |                                |                            |         |
| Oncologic            |                                | 10                         |         |
| Breast cancer        |                                | 3                          |         |
| Urologic/Gynecologic |                                | 3                          |         |
| Melanoma             |                                | 2                          |         |
| Lymphoma             |                                | 1                          |         |
| Sarcoma              |                                | 1                          |         |
| Posttraumatic        |                                | 4                          |         |
| Affected extremity   |                                |                            |         |
| Upper                |                                | 4                          |         |
| Lower                |                                | 10                         |         |
| Lymphedema stage     |                                |                            |         |
| early-stage          |                                | 10                         |         |
| late-stage           |                                | 4                          |         |
