# Supplementary material for: Characterization of Immune Cell Infiltration and Collagen Type III Disorganization in Human Secondary Lymphedema: A Case-control Study
Source: PubMed Central journal article supplement — Plast Reconstr Surg Glob Open. 2024 Jun 17;12(6):e5906. doi: 10.1097/GOX.0000000000005906 (PMC11191027; doi:10.1097/gox.0000000000005906), 2024-06-17
Supplement: gox-12-e5906-s003.pdf [file gox-12-e5906-s003.pdf]

| Experiment    | Para-metric?* | Statistical test  | lymphedema (n=14)                                   | control (n=22)                                      | p-value           |
|---------------|---------------|-------------------|-----------------------------------------------------|-----------------------------------------------------|-------------------|
| CD3           | Yes           | Unpaired t-test   | 2.90±1,02/mm <sup>2</sup>                           | 1.87±0,85/mm <sup>2</sup>                           | <b>0.0026</b>     |
| CD4           | No            | Mann-Whitney test | 1.4/mm <sup>2</sup> (IQR: 1.0-2.5/mm <sup>2</sup> ) | 1.0/mm <sup>2</sup> (IQR: 0.6-1.4/mm <sup>2</sup> ) | <b>0.0056</b>     |
| CD8           | Yes           | Unpaired t-test   | 1.49±0,78/mm <sup>2</sup>                           | 1.38±0,63/mm <sup>2</sup>                           | 0.6638            |
| CD20          | No            | Mann-Whitney test | 1.4/mm <sup>2</sup> (IQR: 1.0-2.2/mm <sup>2</sup> ) | 1.4/mm <sup>2</sup> (IQR: 0.8-2.5/mm <sup>2</sup> ) | 0.5969            |
| CD68          | Yes           | Unpaired t-test   | 2.41±1,21/mm <sup>2</sup>                           | 2.18±1,19/mm <sup>2</sup>                           | 0.5701            |
| CD163         | Yes           | Unpaired t-test   | 1.18±0,55/mm <sup>2</sup>                           | 1.10±0,48/mm <sup>2</sup>                           | 0.6465            |
| iNOS          | No            | Mann-Whitney test | 1.0/mm <sup>2</sup> (IQR: 0.7-2.0/mm <sup>2</sup> ) | 1.5/mm <sup>2</sup> (IQR: 0.8-2.1/mm <sup>2</sup> ) | 0.6654            |
| Collagen area | Yes           | Unpaired t-test   | 45.42±10,02%                                        | 63.54±7,12%                                         | <b>&lt;0.0001</b> |
| Collagen type | No            | Mann-Whitney test | 51.6% (IQR: 40.3-60.4%)                             | 75.0% (IQR: 60.6-79.6%)                             | <b>0.0004</b>     |
| Mast cell     | No            | Mann-Whitney test | 1.2/mm <sup>2</sup> (IQR: 0.6-1,7/mm <sup>2</sup> ) | 0.2/mm <sup>2</sup> (IQR: 0.1-0.4/mm <sup>2</sup> ) | <b>&lt;0.0001</b> |

\*Assumed if Shapiro-Wilk test for normality is passed for both groups

Data is displayed as mean ± standard deviation for parametric tests and median and interquartile range for non-parametric tests

| Experiment          | Para-metric?* | Statistical test | early-stage lymphedema (n=10) | late-stage lymphedema (n=4) | p-value       |
|---------------------|---------------|------------------|-------------------------------|-----------------------------|---------------|
| CD3 subgroup        | Yes           | Unpaired t-test  | 2.95±0,99/mm <sup>2</sup>     | 2.77±1,22/mm <sup>2</sup>   | 0.7804        |
| CD4 subgroup        |               |                  | 1.96±1,19/mm <sup>2</sup>     | 1.64±0,60/mm <sup>2</sup>   | 0.6293        |
| CD8 subgroup        |               |                  | 1.44±0,65/mm <sup>2</sup>     | 1.63±0,64/mm <sup>2</sup>   | 0.6268        |
| CD20 subgroup       |               |                  | 1.77±0,95/mm <sup>2</sup>     | 1.49±0,71/mm <sup>2</sup>   | 0.6087        |
| CD68 subgroup       |               |                  | 2.35±1,15/mm <sup>2</sup>     | 2.59±1,51/mm <sup>2</sup>   | 0.7498        |
| CD163 subgroup      |               |                  | 0.97±0,45/mm <sup>2</sup>     | 1.70±0,44/mm <sup>2</sup>   | <b>0.0175</b> |
| iNOS subgroup       |               |                  | 1.43±0,88/mm <sup>2</sup>     | 1.49±1,11/mm <sup>2</sup>   | 0.9178        |
| Coll. area subgroup |               |                  | 45.55±9,60%                   | 44.95±13,84%                | 0.9316        |
| Coll. type subgroup |               |                  | 48.82±11,78%                  | 59.26±7,22%                 | 0.1762        |
| Mast cell subgroup  |               |                  | 1.05±0,77/mm <sup>2</sup>     | 0.60±0,29/mm <sup>2</sup>   | 0.2811        |

\*Assumed if Shapiro-Wilk test for normality is passed for both groups

Data is displayed as mean ± standard deviation for parametric tests and median and interquartile range for non-parametric tests
