# Supplementary figures and images for: Characterization of Immune Cell Infiltration and Collagen Type III Disorganization in Human Secondary Lymphedema: A Case-control Study
Source: PubMed Central journal article supplement — Plast Reconstr Surg Glob Open. 2024 Jun 17;12(6):e5906. doi: 10.1097/GOX.0000000000005906 (PMC11191027; doi:10.1097/gox.0000000000005906), 2024-06-17

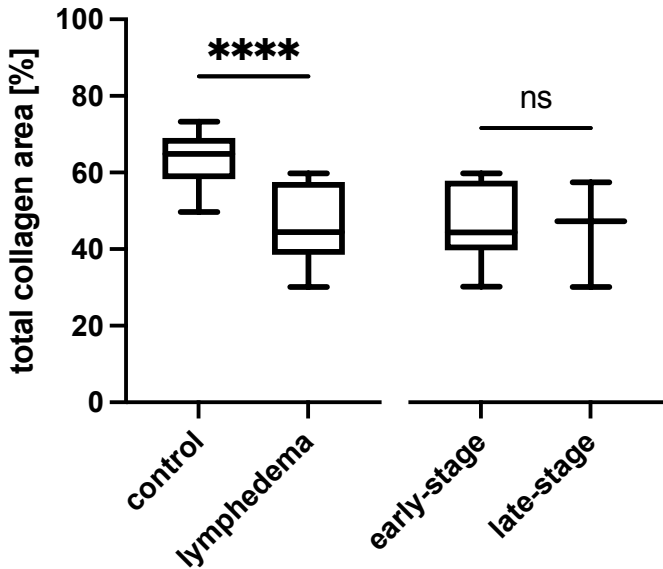

Supplement: gox-12-e5906-s004.pdf [file gox-12-e5906-s004.pdf]

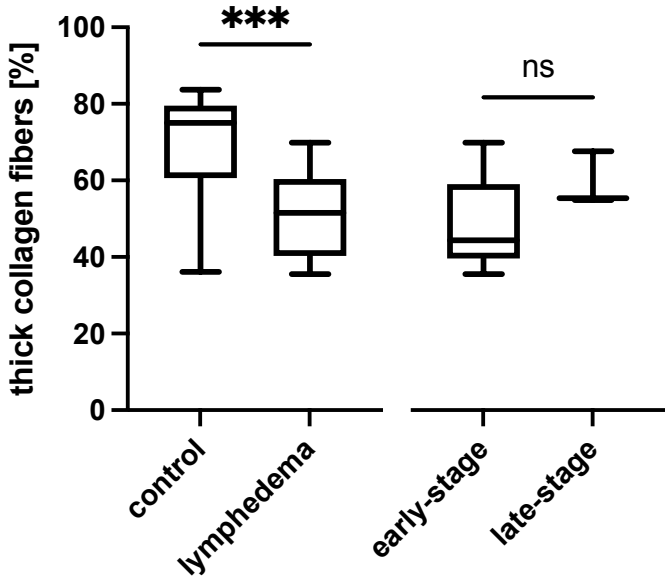

Supplement: gox-12-e5906-s005.pdf [file gox-12-e5906-s005.pdf]
